# Supplementary figures and images for: Spike-phase coupling patterns reveal laminar identity in primate cortex
Source: eLife journal article supplement (doi:10.7554/elife.84512), 2023-04-17

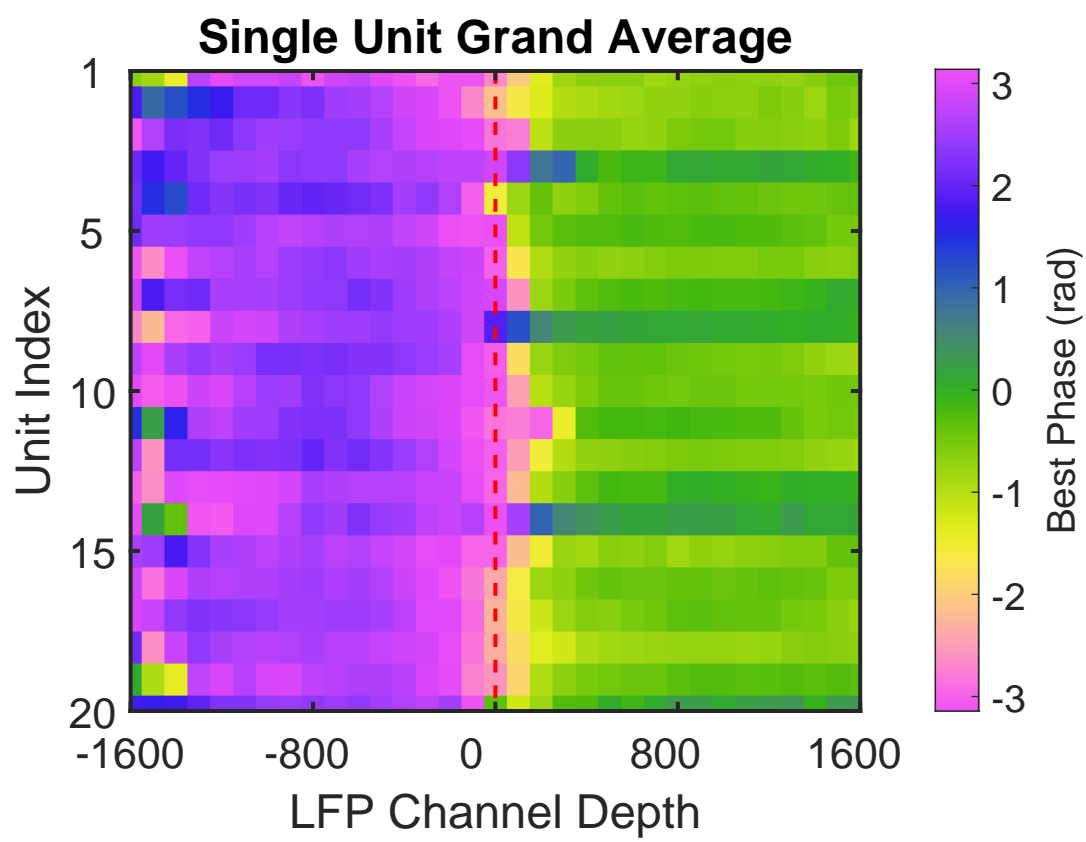

Supplement: supp [file elife-84512-supp-v1.zip]

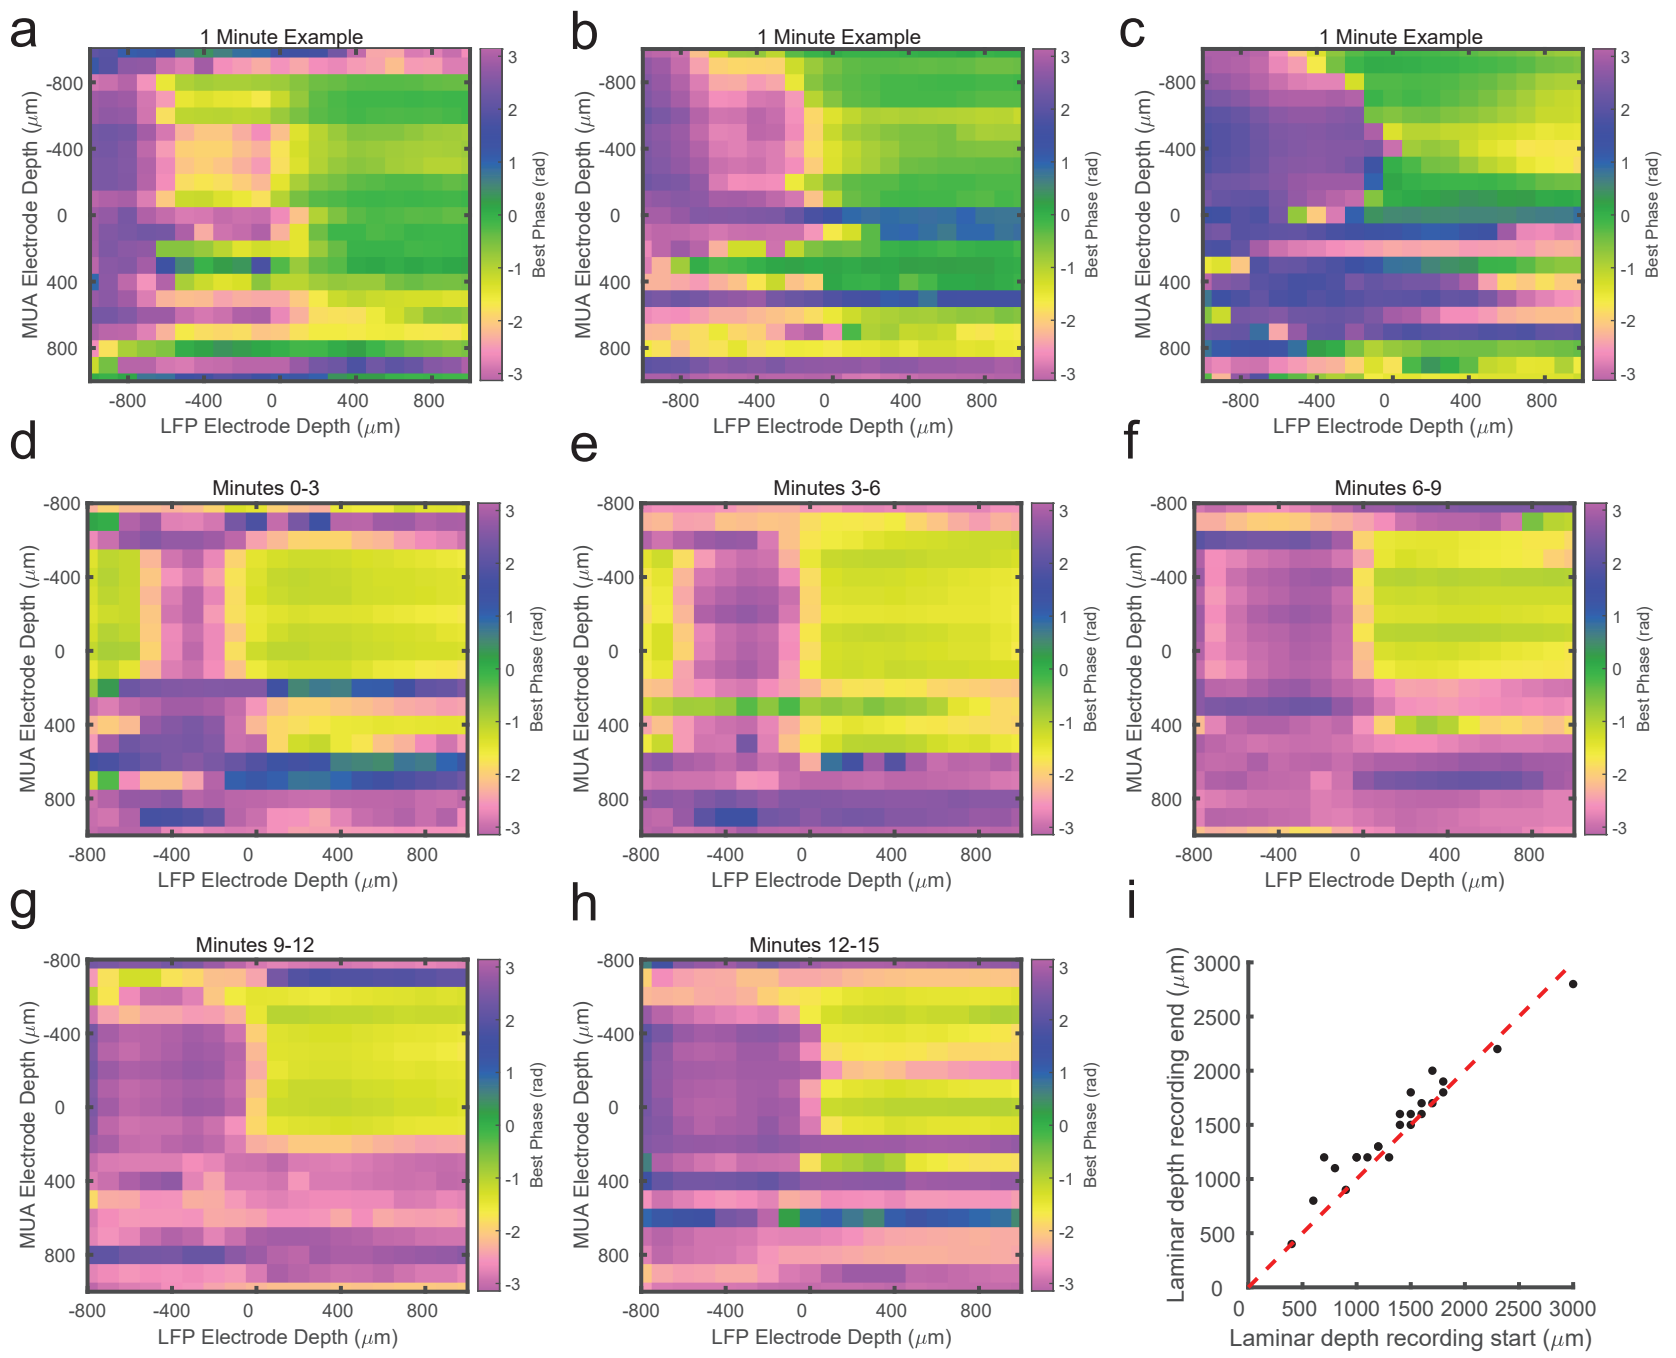

Supplement: supp [file elife-84512-supp-v1.zip]

**a**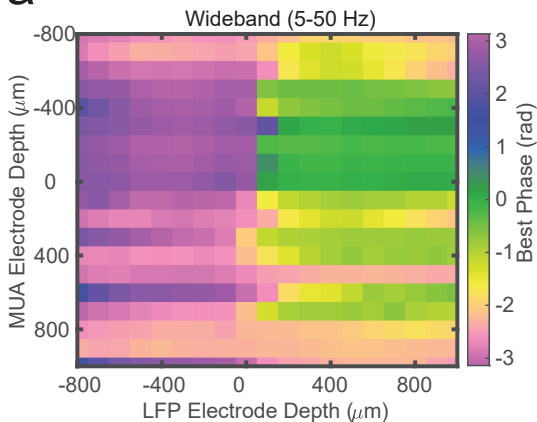**b**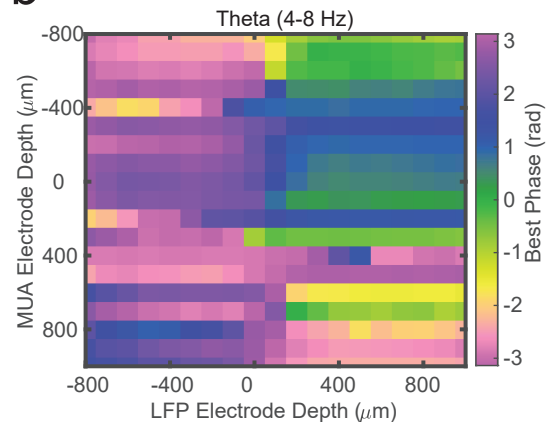**c**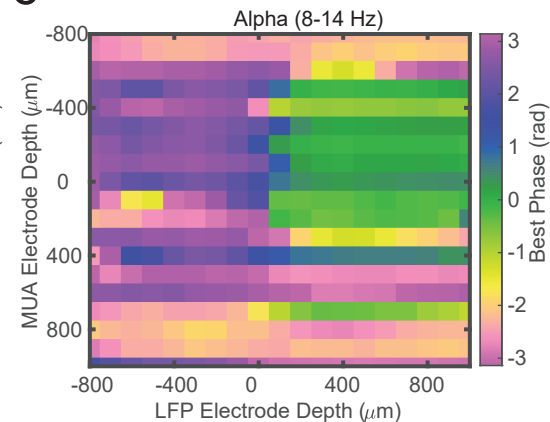**d**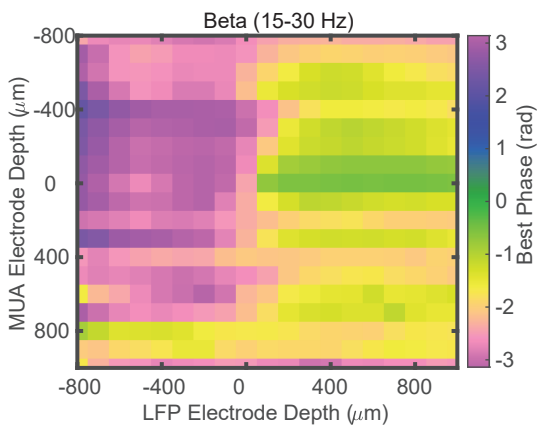**e**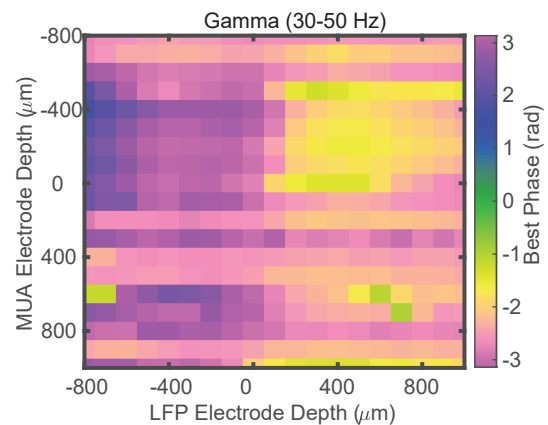**f**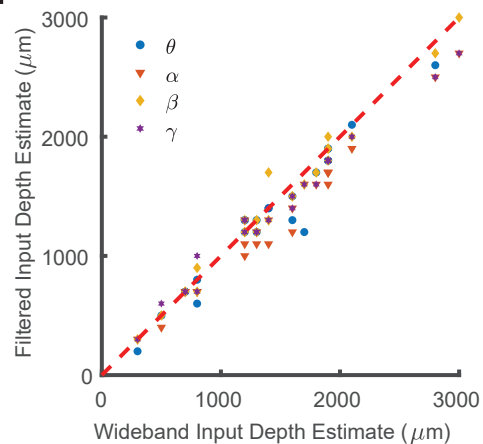

Supplement: supp [file elife-84512-supp-v1.zip]

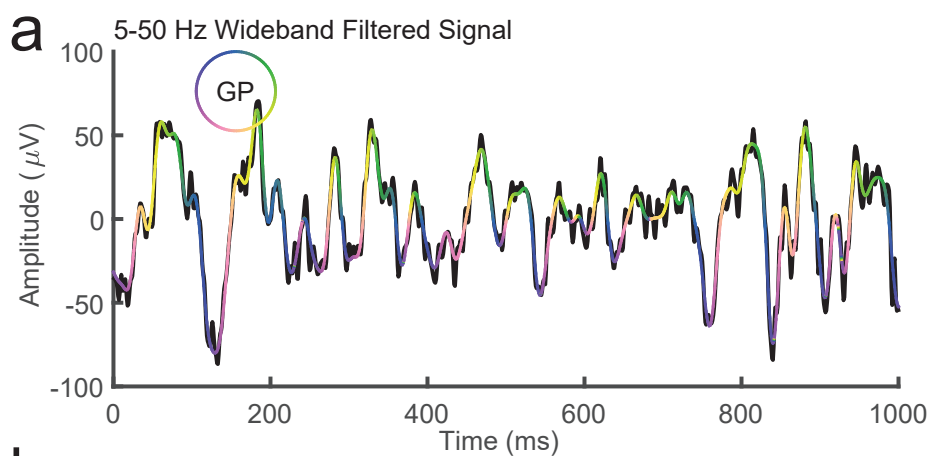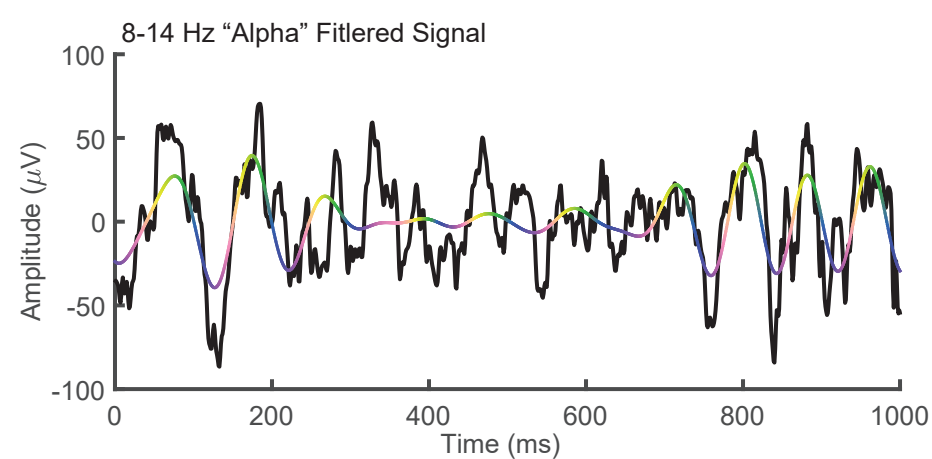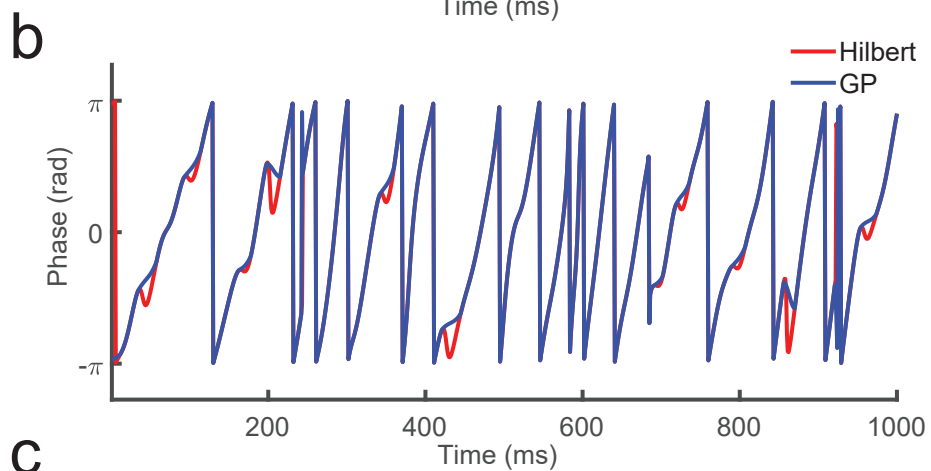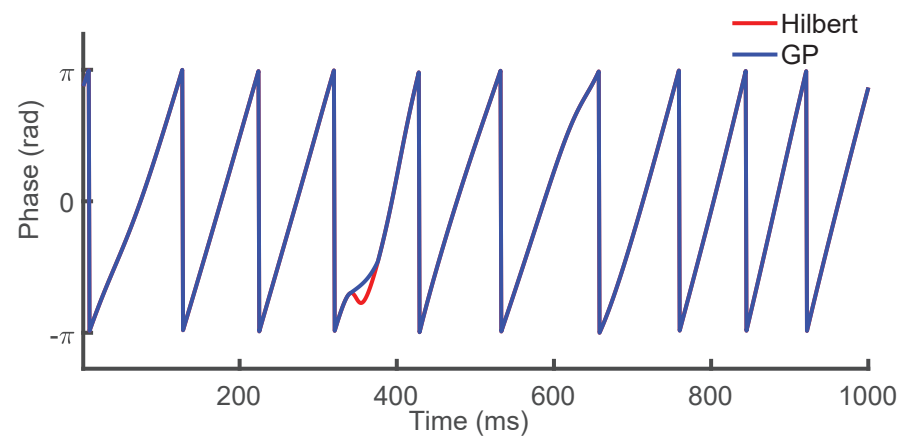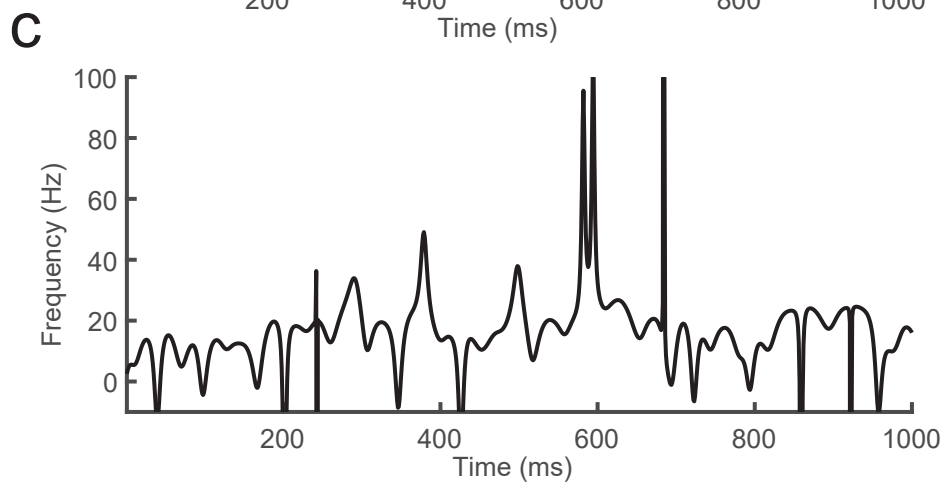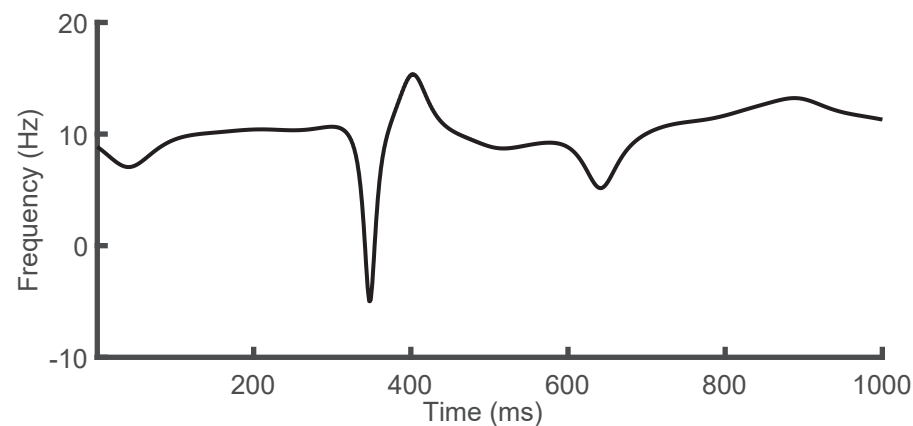

Supplement: supp [file elife-84512-supp-v1.zip]

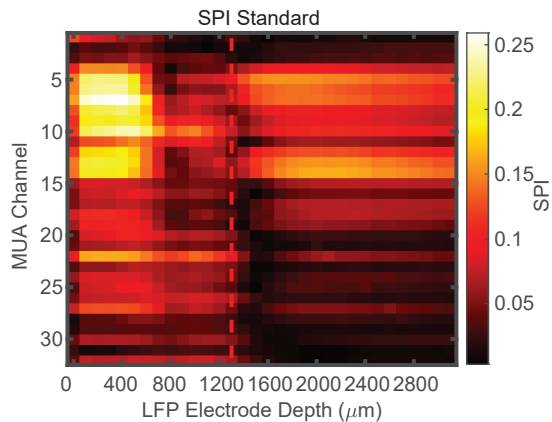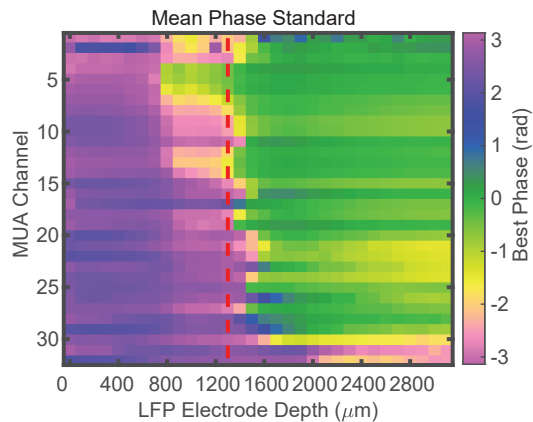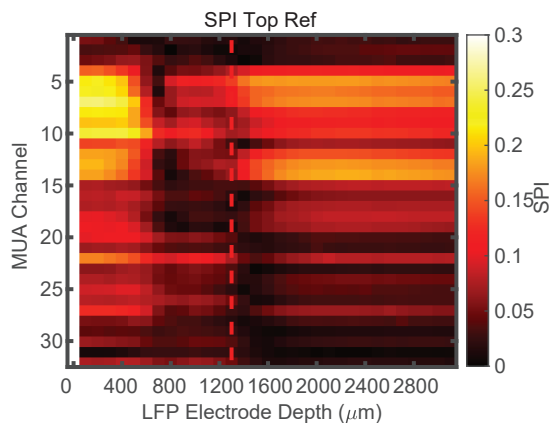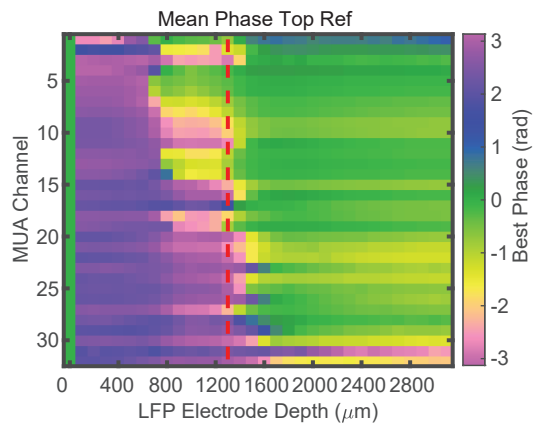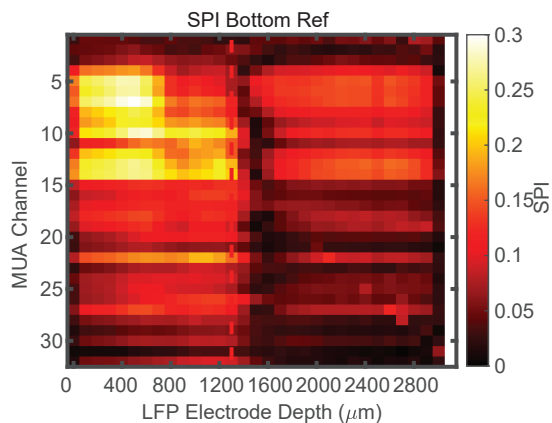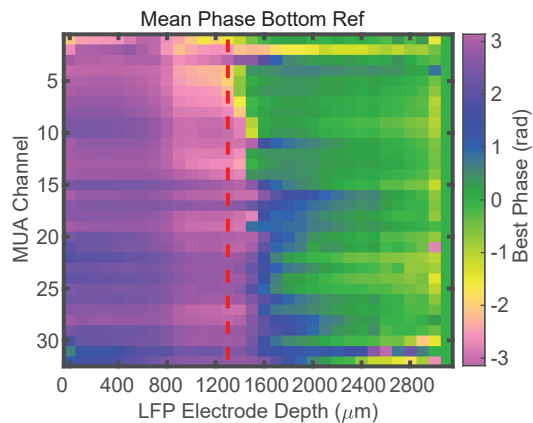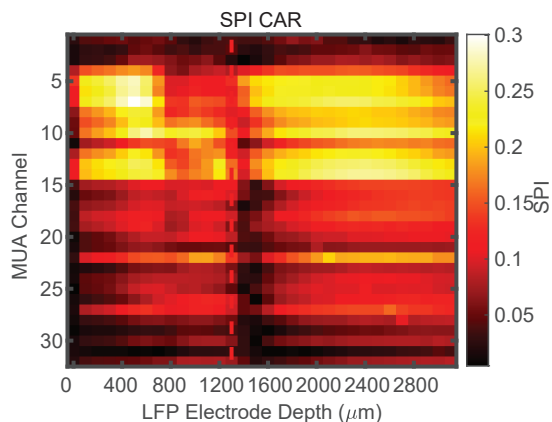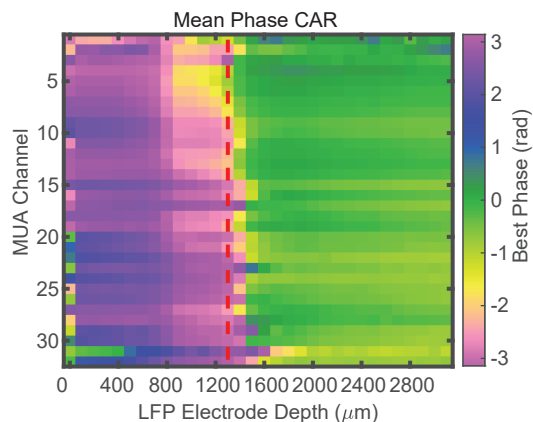

Supplement: supp [file elife-84512-supp-v1.zip]

**a**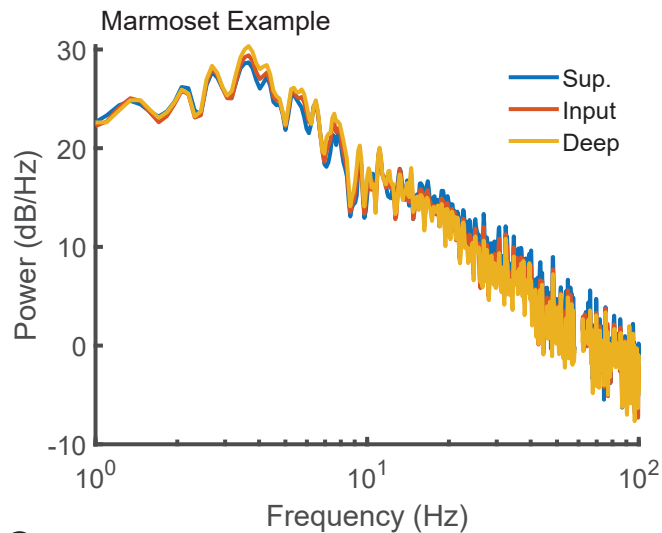**b**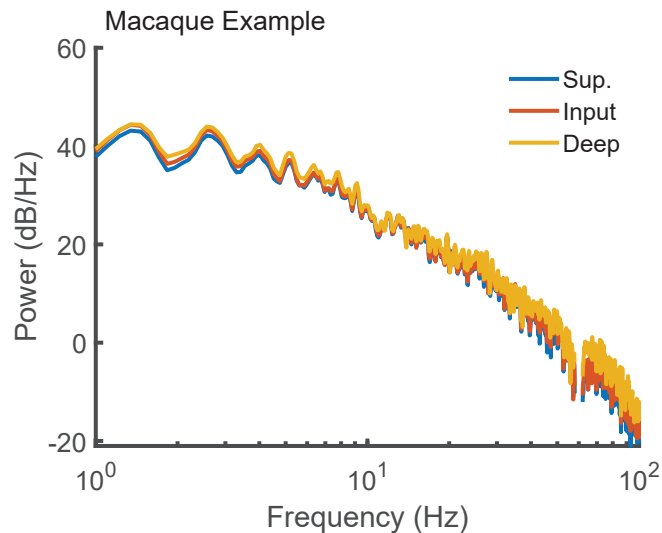**c**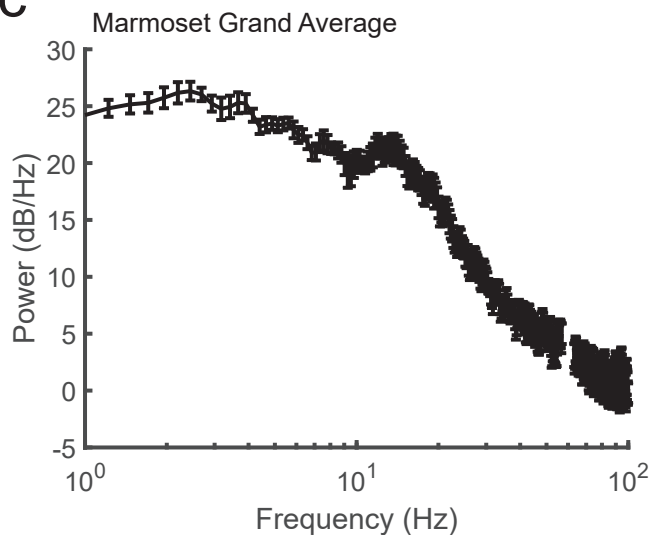**d**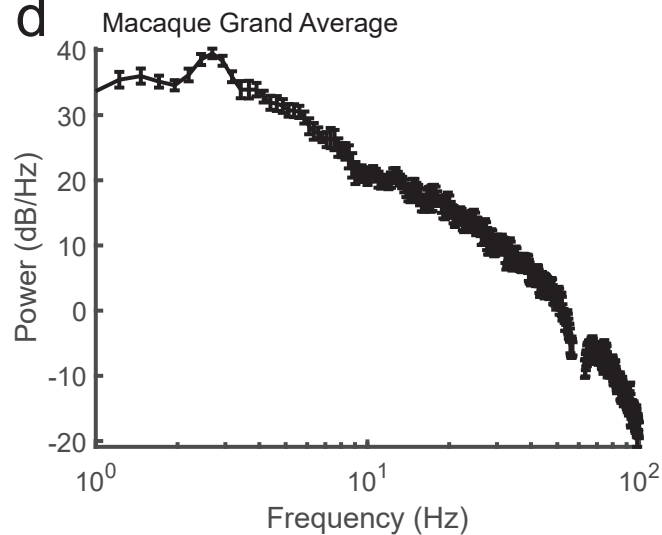

Supplement: supp [file elife-84512-supp-v1.zip]

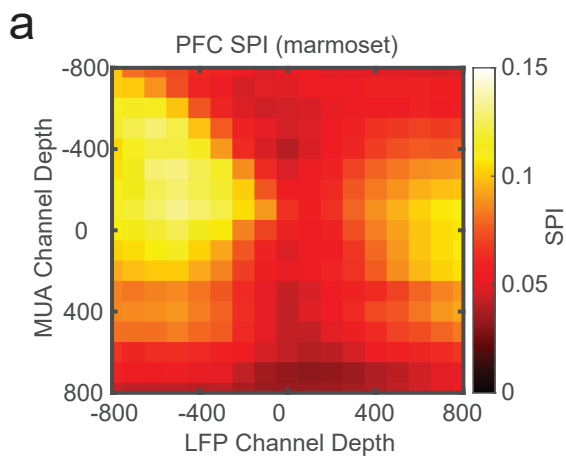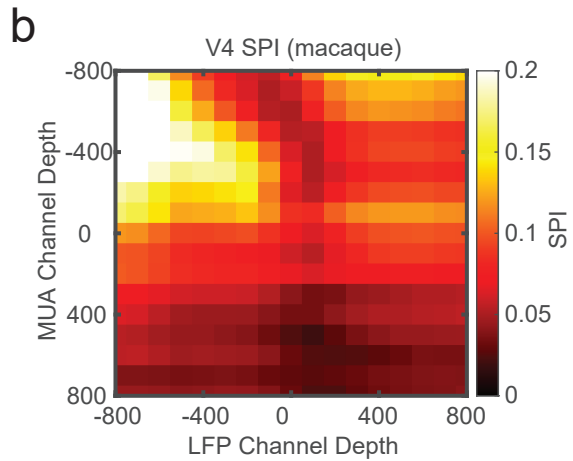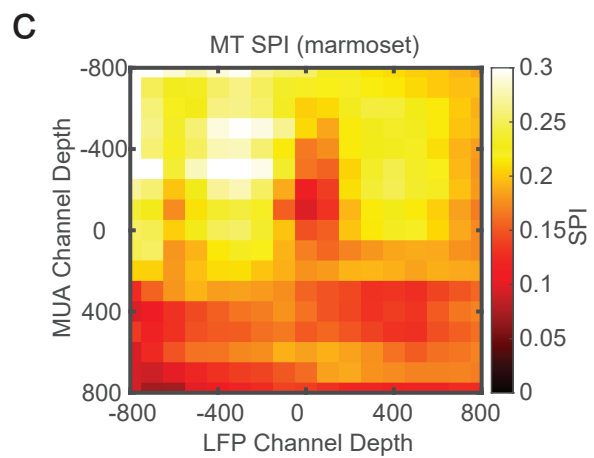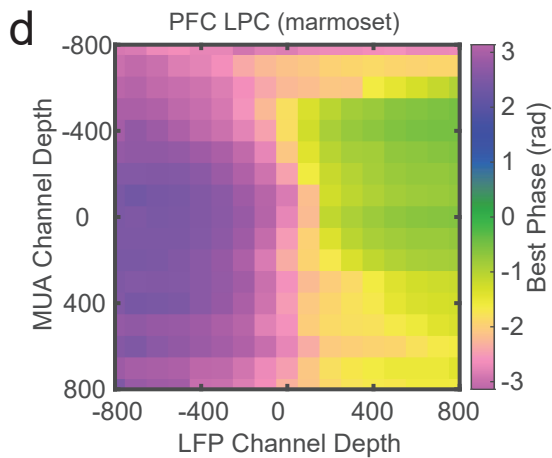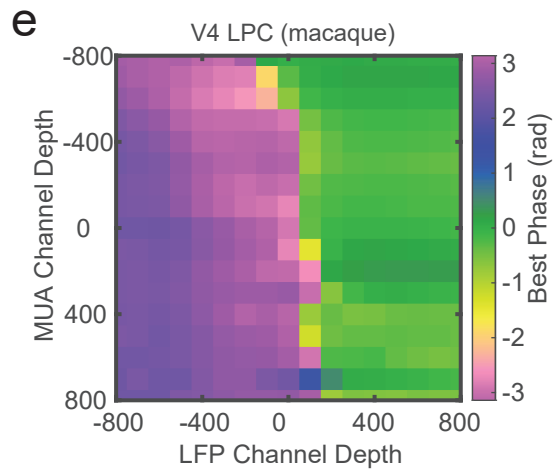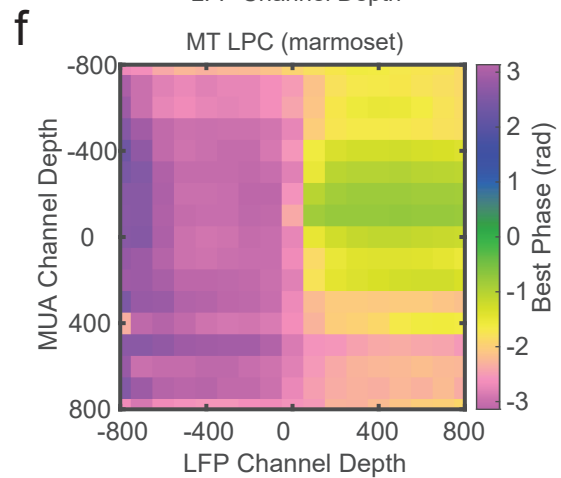

Supplement: supp [file elife-84512-supp-v1.zip]

RF Mapping

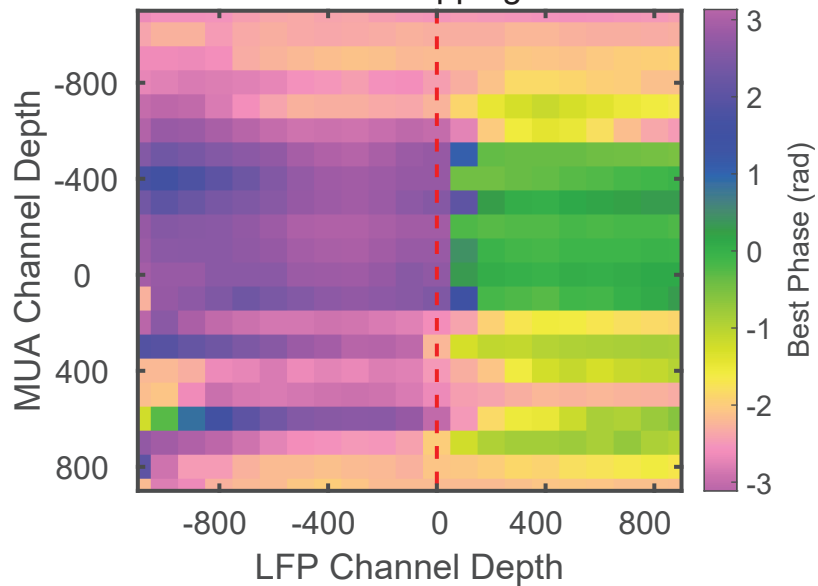

Freely Viewing Darkness

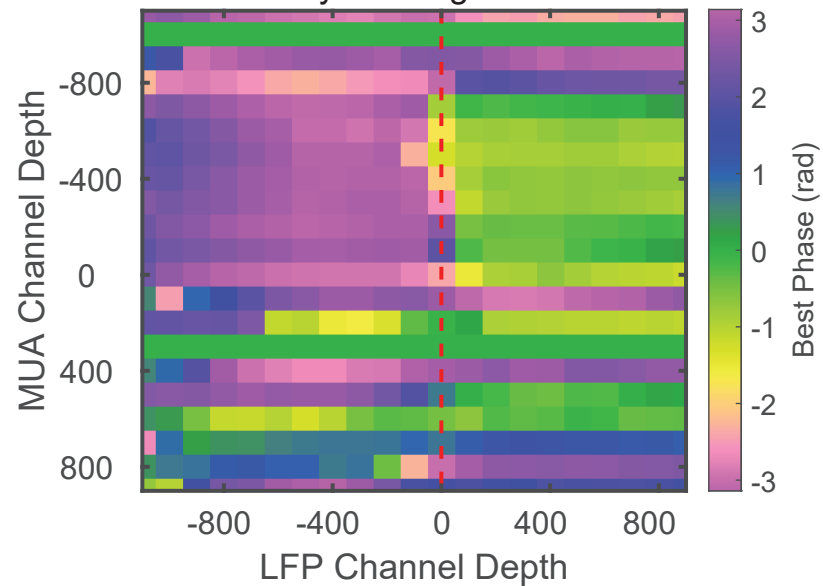

Blank Screen Fixation

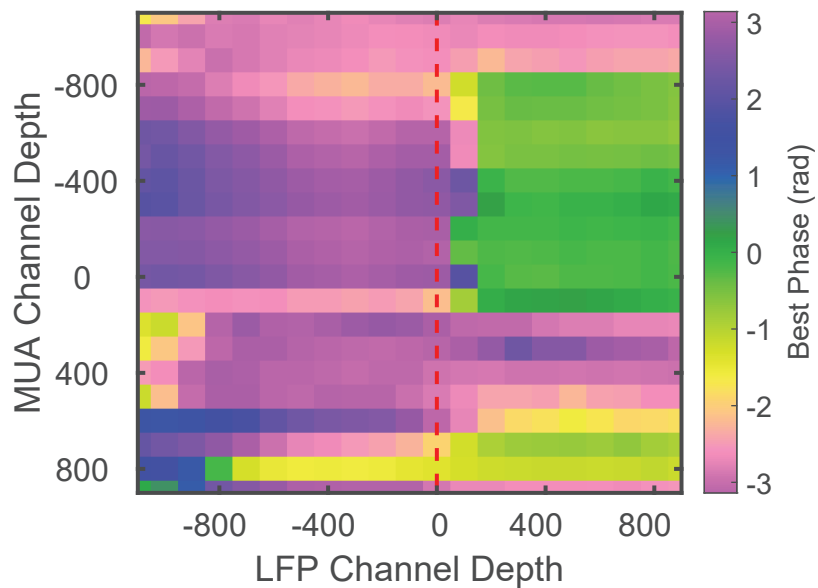

Freely Viewing Natural Scenes

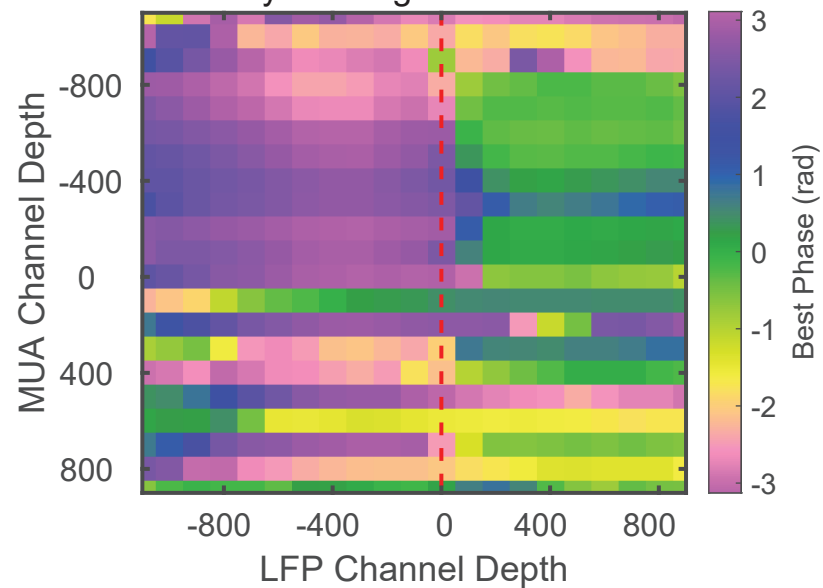

Supplement: supp [file elife-84512-supp-v1.zip]
